# Supplementary material for: Hydrophobic association hydrogels based on N-acryloyl-alanine and stearyl acrylate using gelatin as emulsifier
Source: Royal Society of Chemistry journal article supplement (doi:10.1039/c6ra04762a), 2016-01-01
Supplement: c6ra04762a1.pdf [file c6ra04762a1.pdf]

## Hydrophobic Association Hydrogels Based on *N*-Acryloylalanine and Stearyl Acrylate Using Gelatin as Emulsifier

Zhao Cui,<sup>1§</sup> Ru Cheng,<sup>1§</sup> Jie Liu,<sup>1§</sup> Youping Wu,<sup>1§\*</sup> Jianping Deng<sup>2§\*</sup>

<sup>1</sup>State Key Laboratory of Organic–Inorganic Composites, Beijing University of Chemical Technology, Beijing 100029, China

<sup>2</sup>State Key Laboratory of Chemical Resource Engineering, Beijing University of Chemical Technology, Beijing 100029, China

<sup>§</sup>College of Materials Science and Engineering, Beijing University of Chemical Technology, Beijing 100029, China

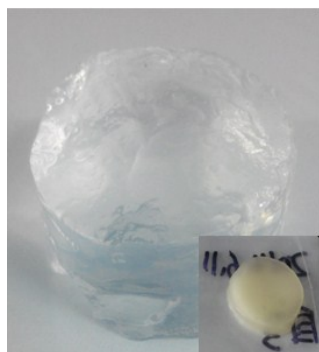

Figure S1. A typical photograph of HAG2% after equilibrium swelling in water (The inset shows the original gel just obtained after polymerization, before drying).

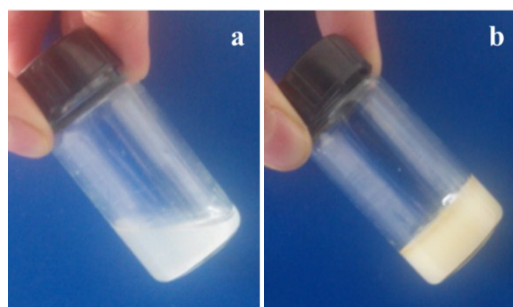

Figure S2. The photographs of (a) blank experiment 1 and (b) blank experiment 2.
